# Supplementary material
Source: PubMed Central journal article supplement (PMC4422247)
Supplement: CJN.10141014_CJN10141014SupplementaryData1.pdf [file CJN.10141014_CJN10141014SupplementaryData1.pdf]

**Supplemental table 1: Overview of underlying mutations and their primary literature report, renal phenotype, Karyotype (KT) and gender**

Legend: Age at onset (dx) of proteinuria and Wilms Tumour (WT) unilateral (ul) or bilateral (bl). Immunosuppressive (IS) treatment yes (Y) or no (N), all were irresponsive to steroids, \*partial remission with cyclosporin A (CsA), \*\* no response to CsA.

One patient (†) was excluded from correlation analyses as he initially presented with HUS. One patient died aged 5 months (†). In one patient @ incidental finding of nephroblastomatosis WT stage 1 when prophylactic bilateral nephrectomy was performed, no chemotherapy. One patient § with concomitant heterozygous *NPHS1* mutation was included in the analysis. 6 proteinuric patients with a median follow up of 7.4 years [5.4-15.4] did have unimpaired renal function. 3 patients without proteinuria did not have impaired renal function at the age of 4.2, 5.8 and 13.1 years.

Abbreviations: FSGS, focal segmental glomerulosclerosis; MCD, minimal change disease; DMS, diffuse mesangial sclerosis

| Patient number                                  | Exon/<br>Intron | Mutation  | Protein     | Age at follow-up (years) | Age at dx proteinuria (months) | Renal Histology | IS treatment | Age at start RRT (months) | eGFR | WT              | Age at dx WT (months) | KT/<br>Gender | Primary literature report |
|-------------------------------------------------|-----------------|-----------|-------------|--------------------------|--------------------------------|-----------------|--------------|---------------------------|------|-----------------|-----------------------|---------------|---------------------------|
| <b>Missense mutations in DNA-binding region</b> |                 |           |             |                          |                                |                 |              |                           |      |                 |                       |               |                           |
| 1 <sup>t</sup>                                  | Exon 8          | c.1300C>T | p.Arg434Cys | 0.4                      | 1                              | FSGS            | N            | 1                         | -    | -               | -                     | <b>XY/f</b>   | 1                         |
| 2                                               | Exon 8          | c.1322A>G | p.His441Arg | 12.7                     | 4                              | DMS             | N            | 13                        | -    | -               | -                     | XX/f          | this study                |
| 3                                               | Exon 8          | c.1339G>T | p.Gly447Cys | 17.8                     | 3                              | DMS             | Y            | 3                         | -    | -               | -                     | XX/f          | 2                         |
| 4                                               | Exon 9          | c.1384C>T | p.Arg462Trp | 1.1                      | 0.1                            | -               | N            | -                         | 60   | -               | -                     | XY/m          | 3                         |
| 5                                               | Exon 9          | c.1384C>T | p.Arg462Trp | 7.6                      | 14                             | DMS             | N            | 14                        | -    | ul              | 14                    | XX/f          | 3                         |
| 6                                               | Exon 9          | c.1384C>T | p.Arg462Trp | 8.1                      | 10                             | DMS             | N            | 13                        | -    | ul <sup>@</sup> | 15                    | XY/m          | 3                         |
| 7                                               | Exon 9          | c.1384C>T | p.Arg462Trp | 18.8                     | 59                             | DMS             | N            | 59                        | -    | -               | -                     | XY/m          | 3                         |
| 8                                               | Exon 9          | c.1384C>T | p.Arg462Trp | 21.9                     | 7                              | Other           | N            | 7                         | -    | -               | -                     | <b>XY/f</b>   | 3                         |
| 9 <sup>+</sup>                                  | Exon 9          | c.1384C>T | p.Arg462Trp | 6.7                      | 7                              | DMS             | N            | 7                         | -    | -               | -                     | XY/m          | 3                         |
| 10                                              | Exon 9          | c.1384C>T | p.Arg462Trp | 11.7                     | 49                             | FSGS            | Y            | 52                        | -    | -               | -                     | XX/f          | 3                         |
| 11                                              | Exon 9          | c.1384C>T | p.Arg462Trp | 0.3                      | 1                              | -               | N            | -                         | 15   | -               | -                     | XX/f          | 3                         |
| 12                                              | Exon 9          | c.1384C>T | p.Arg462Trp | 6.2                      | 17                             | FSGS            | Y            | -                         | ≥90  | ul              | 61                    | XY/m          | 3                         |
| 13                                              | Exon 9          | c.1384C>T | p.Arg462Trp | 3.2                      | 8                              | DMS             | N            | 8                         | -    | -               | -                     | XX/f          | 3                         |
| 14                                              | Exon 9          | c.1384C>T | p.Arg462Trp | 13.9                     | 22                             | DMS             | N            | 62                        | -    | ul              | 22                    | XY/m          | 3                         |
| 15                                              | Exon 9          | c.1384C>T | p.Arg462Trp | 15.8                     | 7                              | DMS             | N            | 7                         | -    | -               | -                     | - /f          | 3                         |
| 16                                              | Exon 9          | c.1384C>T | p.Arg462Trp | 12.8                     | 16                             | FSGS            | Y**          | 94                        | -    | ul              | 16                    | XX/f          | 3                         |
| 17                                              | Exon 9          | c.1384C>T | p.Arg462Trp | 19.3                     | 5                              | DMS             | N            | 21                        | -    | ul              | 4                     | <b>XY/f</b>   | 3                         |
| 18                                              | Exon 9          | c.1385G>A | p.Arg462Gln | 16.8                     | 0.1                            | FSGS            | N            | 4                         | -    | -               | -                     | XY/m          | 1                         |
| 19                                              | Exon 9          | c.1385G>A | p.Arg462Gln | 15.3                     | 2                              | DMS             | N            | 5                         | -    | -               | -                     | XY/m          | 1                         |
| 20                                              | Exon 9          | c.1385G>A | p.Arg462Gln | 4.0                      | 0.5                            | Other           | N            | 0,1                       | -    | -               | -                     | XY/m          | 1                         |
| 21                                              | Exon 9          | c.1385G>C | p.Arg462Pro | 6.6                      | 7                              | DMS             | N            | 7                         | -    | -               | -                     | XX/f          | 4                         |
| 22                                              | Exon 9          | c.1385G>C | p.Arg462Pro | 4.3                      | 1                              | -               | N            | 1                         | -    | -               | -                     | XY/m          | 4                         |
| 23                                              | Exon 9          | c.1390G>A | p.Asp464Asn | 0.9                      | 3                              | FSGS            | N            | 17                        | -    | -               | -                     | XY/m          | 3                         |
| 24                                              | Exon 9          | c.1390G>A | p.Asp464Asn | 9.2                      | 19                             | DMS             | N            | 47                        | -    | bl              | 16                    | XX/f          | 3                         |
| 25                                              | Exon 9          | c.1390G>A | p.Asp464Asn | 1.0                      | 4                              | DMS             | N            | 4                         | -    | -               | -                     | XY/m          | 3                         |
| 26                                              | Exon 9          | c.1390G>C | p.Asp464His | 0.9                      | 3                              | DMS             | N            | 4                         | -    | bl              | 3                     | XY/m          | 5                         |
| 27                                              | Exon 9          | c.1391A>G | p.Asp464Gly | 2.4                      | 4                              | -               | N            | 12                        | -    | ul              | 12                    | XX/f          | 3                         |

| Patient number                             | Exon/<br>Intron | Mutation                | Protein       | Age at follow-up (years) | Age at dx proteinuria (months) | Renal Histology | IS treatment   | Age at start RRT (months) | eGFR if no RRT | WT | Age at dx WT (months) | KT/<br>Gender | Primary literature report |
|--------------------------------------------|-----------------|-------------------------|---------------|--------------------------|--------------------------------|-----------------|----------------|---------------------------|----------------|----|-----------------------|---------------|---------------------------|
| 28                                         | Exon 9          | c.1394A>C               | p.His465Pro   | 11.9                     | 63                             | DMS             | N              | 63                        | -              | ul | 18                    | XX/f          | 6                         |
| 29                                         | Exon 9          | c.1394A>C               | p.His465Pro   | 12.1                     | 15                             | FSGS            | Y              | 112                       | -              | -  |                       | XX/f          | 6                         |
| <b>Missense mutations in other regions</b> |                 |                         |               |                          |                                |                 |                |                           |                |    |                       |               |                           |
| 30                                         | Exon 2          | c.745C>T                | p.Pro249Ser   | 13.2                     | -                              | -               | N              | -                         | ≥90            | -  | -                     | XY/m          | 7                         |
| 31                                         | Exon 7          | c.1220A>G               | p.His407Arg   | 17.7                     | 198                            | FSGS            | N              | -                         | 60             | -  | -                     | - /m          | this study                |
| 32                                         | Exon 8          | c.1008 G>T              | p.Gln369His   | 14.6                     | 0.1                            | DMS             | N              | 35                        | -              | -  | -                     | XY/m          | this study                |
| 33                                         | Exon 8          | c.1289G>C               | p.Arg430Pro   | 8.5                      | 21                             | DMS             | Y**            | 21                        | -              | -  | -                     | XY/m          | this study                |
| 34                                         | Exon 9          | c.1357T>C               | p.Cys453Arg   | 4.3                      | 7                              | DMS             | N              | 15                        | -              | -  | -                     | XY/m          | 8                         |
| 35                                         | Exon 9          | c.1357T>C               | p.Cys453Arg   | 25.4                     | 35                             | Other           | N              | 50                        | -              | ul | 35                    | XY/m          | 8                         |
| 36                                         | Exon 9          | c.1366T>C               | p.Cys456Arg   | 9.3                      | 1                              | DMS             | N              | 20                        | -              | ul | 18                    | XX/f          | 6                         |
| <b>Truncating mutations</b>                |                 |                         |               |                          |                                |                 |                |                           |                |    |                       |               |                           |
| 37                                         | Exon 1          | c.369_385del            | p.Ala123fs*89 | 4.3                      | -                              | -               | N              | -                         | ≥90            | bl | 8                     | XY/m          | this study                |
| 38                                         | Exon 1          | c.525T>A                | p.Cys175*     | 5.8                      | -                              | -               | N              | -                         | ≥90            | bl | 12                    | XY/m          | this study                |
| 39                                         | Exon 8          | c.1288C>T               | p.Arg430*     | 23.1                     | 142                            | FSGS            | N              | 201                       | -              | bl | 11                    | XY/m          | 9                         |
| 40                                         | Exon 8          | c.1288C>T               | p.Arg430*     | 19.1                     | 147                            | FSGS            | N              | 197                       | -              | bl | 14                    | XX/f          | 9                         |
| 41                                         | Exon 9          | c.1372C>T               | p.Arg458*     | 16.6                     | 94                             | -               | N              | 199                       | -              | bl | 10                    | XY/m          | 7                         |
| 42                                         | Exon 9          | c.1372C>T               | p.Arg458*     | 30.4                     | 138                            | FSGS            | N              | -                         | 58             | -  | -                     | XY/m          | 7                         |
| 43                                         | Exon 9          | c.1372C>T               | p.Arg458*     | 22.1                     | 38                             | FSGS            | N              | 193                       | -              | ul | 22                    | - /m          | 7                         |
| 44                                         | Exon 9          | c.1372C>T               | p.Arg458*     | 12.4                     | 79                             | Other           | N              | -                         | 51             | ul | 16                    | XY/m          | 7                         |
| <b>Splice site mutations</b>               |                 |                         |               |                          |                                |                 |                |                           |                |    |                       |               |                           |
| 45                                         | Intron 9        | IVS9+4C>T (c.1432+4C>T) |               | 26.1                     | 116                            | Other           | N              | 137                       | -              | -  | -                     | <b>XY/f</b>   | 10                        |
| 46                                         | Intron 9        | IVS9+4C>T (c.1432+4C>T) |               | 21.8                     | 47                             | MCD             | Y*             | -                         | ≥90            | -  | -                     | XX/f          | 10                        |
| 47                                         | Intron 9        | IVS9+4C>T (c.1432+4C>T) |               | 9.2                      | 8                              | FSGS            | Y*             | -                         | 50             | -  | -                     | <b>XY/f</b>   | 10                        |
| 48                                         | Intron 9        | IVS9+4C>T (c.1432+4C>T) |               | 8.5                      | 75                             | FSGS            | N              | -                         | ≥90            | -  | -                     | XY/m          | 10                        |
| 49                                         | Intron 9        | IVS9+4C>T (c.1432+4C>T) |               | 43.1                     | 83                             | FSGS            | Y              | 156                       | -              | -  | -                     | XX/f          | 10                        |
| 50                                         | Intron 9        | IVS9+5G>A (c.1432+5G>A) |               | 21.0                     | 35                             | FSGS            | Y*             | 218                       | -              | -  | -                     | XX/f          | 4                         |
| 51                                         | Intron 9        | IVS9+5G>A (c.1432+5G>A) |               | 15.0                     | 48                             | MCD             | Y              | -                         | 46             | -  | -                     | <b>XY/f</b>   | 4                         |
| 52                                         | Intron 9        | IVS9+5G>A (c.1432+5G>A) |               | 21.0                     | 66                             | MCD             | Y              | -                         | 50             | -  | -                     | XX/f          | 4                         |
| 53                                         | Intron 9        | IVS9+5G>A (c.1432+5G>A) |               | 41.0                     | 27                             | FSGS            | Y <sup>§</sup> | 95                        | -              | -  | -                     | XX/f          | 4                         |

**Supplemental table 2: Subgroup analysis of 14 patients with missense mutation c.1384C>T leading to p.Arg462Trp**

|                                                        |                      |                     |
|--------------------------------------------------------|----------------------|---------------------|
| Age at follow up                                       | 9.9 (5.5-16.6) years |                     |
| Nephrotic range proteinuria                            | 14/14 (100%)         |                     |
| Age at diagnosis of proteinuria                        | 9 (6.5-18.3) months  |                     |
| Renal replacement treatment                            | 11/14 (79%)          |                     |
| Age at start of RRT                                    | 14 (7-59) months     |                     |
| Renal histology                                        | DMS                  | 7/14 (50%)          |
|                                                        | FSGS                 | 3/14 (22%)          |
| Wilms Tumour (unilateral)                              |                      | 6/14 (43%)          |
| Age at diagnosis of WT                                 |                      | 15.5 (12-32) months |
| Karyotype/gender                                       | XY/m                 | 6/14 (43%)          |
|                                                        | XY/f                 | 2/14 (14%)          |
|                                                        | XX/f                 | 5/14 (36%)          |
|                                                        | ?/f                  | 1/14 (7%)           |
| XY DSD                                                 |                      |                     |
| Cryptorchidism                                         |                      | 1/8 (12.5%)         |
| Cryptorchidism, glandular hypospadias                  |                      | 1/8 (12.5%)         |
| Cryptorchidism, penoscrotal hypospadias, +/-micropenis |                      | 4/8 (50%)           |
| Sex Reversal (complete gonadal dysgenesis)             |                      | 2/8 (25%)           |
| XX females with streak ovaries                         |                      | 1/5 (20%)           |

**Supplemental table 3: Allele frequencies and prediction of pathogenicity of *WT1* mutations**

| Patient number                                                | Genomic Position | CDC                            | Protein     | TGP AF | ESP AF | CG69 AF | NCI-60 AF | GoNL AF | ExAC AF | SIFT Score | SIFT Pred. | PolyP.-2 HumVar Score | PolyP.-2 HumVar Pred. | FATHMM Score | FATHMM Pred. | VEST Score | VEST Pred. | CADD Score | CADD Pred.    |
|---------------------------------------------------------------|------------------|--------------------------------|-------------|--------|--------|---------|-----------|---------|---------|------------|------------|-----------------------|-----------------------|--------------|--------------|------------|------------|------------|---------------|
| <b>Missense mutations in DNA-binding region</b>               |                  |                                |             |        |        |         |           |         |         |            |            |                       |                       |              |              |            |            |            |               |
| 1                                                             | 32414251         | c.1300C>T                      | p.Arg434Cys | 0.00 % | 0.00 % | 0.00 %  | 0.00 %    | 0.00 %  | 0.00 %  | 0.01       | Damaging   | 1                     | Probably Damaging     | 1.26         | Tolerated    | 0.969      | Damaging   | 27.4       | Pathogenic    |
| 2                                                             | 32414229         | c.1322A>G                      | p.His441Arg | 0.00 % | 0.00 % | 0.00 %  | 0.00 %    | 0.00 %  | 0.00 %  | 0          | Damaging   | 0.999                 | Probably Damaging     | -2.18        | Damaging     | 0.963      | Damaging   | 25.9       | Pathogenic    |
| 3                                                             | 32414212         | c.1339G>T                      | p.Gly447Cys | 0.00 % | 0.00 % | 0.00 %  | 0.00 %    | 0.00 %  | 0.00 %  | NA         | NA         | 0.997                 | Probably Damaging     | 1.72         | Tolerated    | 0.923      | Damaging   | 33         | Pathogenic    |
| 4 ; 5 ; 6 ; 7 ; 8 ; 9 ; 10 ; 11 ; 12 ; 13 ; 14 ; 15 ; 16 ; 17 | 32413566         | c.1384C>T                      | p.Arg462Trp | 0.00 % | 0.00 % | 0.00 %  | 0.00 %    | 0.00 %  | 0.00 %  | 0.01       | Damaging   | 1                     | Probably Damaging     | 1.95         | Tolerated    | 0.953      | Damaging   | 23         | Pathogenic    |
| 18 ; 19 ; 20                                                  | 32413565         | c.1385G>A                      | p.Arg462Gln | 0.00 % | 0.00 % | 0.00 %  | 0.00 %    | 0.00 %  | 0.00 %  | 0.29       | Tolerated  | 0.998                 | Probably Damaging     | 1.982        | Tolerated    | 0.859      | Tolerated  | 36         | Pathogenic    |
| 21 ; 22                                                       | 32413565         | c.1385G>C                      | p.Arg462Pro | 0.00 % | 0.00 % | 0.00 %  | 0.00 %    | 0.00 %  | 0.00 %  | 0          | Damaging   | 1                     | Probably Damaging     | 1.95         | Tolerated    | 0.983      | Damaging   | 34         | Pathogenic    |
| 23 ; 24 ; 25                                                  | 32413560         | c.1390G>A                      | p.Asp464Asn | 0.00 % | 0.00 % | 0.00 %  | 0.00 %    | 0.00 %  | 0.00 %  | 0.02       | Damaging   | 0.944                 | Probably Damaging     | 1.992        | Tolerated    | 0.102      | Tolerated  | 36         | Pathogenic    |
| 26                                                            | 32413560         | c.1390G>C                      | p.Asp464His | 0.00 % | 0.00 % | 0.00 %  | 0.00 %    | 0.00 %  | 0.00 %  | 0.02       | Damaging   | 0.993                 | Probably Damaging     | 2.338        | Tolerated    | 0.961      | Damaging   | 31         | Pathogenic    |
| 27                                                            | 32413559         | c.1391A>G                      | p.Asp464Gly | 0.00 % | 0.00 % | 0.00 %  | 0.00 %    | 0.00 %  | 0.00 %  | 0.17       | Tolerated  | 0.198                 | Benign                | 2            | Tolerated    | 0.979      | Damaging   | 26.3       | Pathogenic    |
| 28 ; 29                                                       | 32413556         | c.1394A>C                      | p.His465Pro | 0.00 % | 0.00 % | 0.00 %  | 0.00 %    | 0.00 %  | 0.00 %  | 0          | Damaging   | 0.999                 | Probably Damaging     | 1.61         | Tolerated    | 0.973      | Damaging   | 25.7       | Pathogenic    |
| <b>Missense mutations in other regions</b>                    |                  |                                |             |        |        |         |           |         |         |            |            |                       |                       |              |              |            |            |            |               |
| 30                                                            | 32450067         | c.745C>T                       | p.Pro249Ser | 0.04 % | 0.04 % | 0.00 %  | 0.00 %    | 0.10 %  | 0.04 %  | 0.32       | Tolerated  | 0.016                 | Benign                | -1.84        | Damaging     | 0.729      | Tolerated  | 20.9       | Pathogenic    |
| 31                                                            | 32417832         | c.1220A>G                      | p.His407Arg | 0.00 % | 0.00 % | 0.00 %  | 0.00 %    | 0.00 %  | 0.00 %  | 0.02       | Damaging   | 0.786                 | Possibly Damaging     | 1.32         | Tolerated    | 0.851      | Tolerated  | 32         | Pathogenic    |
| 32                                                            | 32421584         | c.1008C>A                      | p.Ser336Arg | 0.00 % | 0.00 % | 0.00 %  | 0.00 %    | 0.00 %  | 0.00 %  | 0.42       | Tolerated  | 0.065                 | Benign                | -1.94        | Damaging     | 0.304      | Tolerated  | 13.34      | Nonpathogenic |
| 33                                                            | 32414262         | c.1289G>C                      | p.Arg430Pro | 0.00 % | 0.00 % | 0.00 %  | 0.00 %    | 0.00 %  | 0.00 %  | 0          | Damaging   | 0.954                 | Probably Damaging     | 2.12         | Tolerated    | 0.974      | Damaging   | 32         | Pathogenic    |
| 34 ; 35                                                       | 32413593         | c.1357T>C                      | p.Cys453Arg | 0.00 % | 0.00 % | 0.00 %  | 0.00 %    | 0.00 %  | 0.00 %  | 0          | Damaging   | 1                     | Probably Damaging     | -1.96        | Damaging     | 0.995      | Damaging   | 24.7       | Pathogenic    |
| 36                                                            | 32413584         | c.1366T>C                      | p.Cys456Arg | 0.00 % | 0.00 % | 0.00 %  | 0.00 %    | 0.00 %  | 0.00 %  | 0          | Damaging   | 0.999                 | Probably Damaging     | -2.05        | Damaging     | 0.992      | Damaging   | 26.6       | Pathogenic    |
| <b>Truncating mutations</b>                                   |                  |                                |             |        |        |         |           |         |         |            |            |                       |                       |              |              |            |            |            |               |
| 37                                                            | 32456507         | c.369_385delGCGGAG CCGGTGGCGGC | p.Ala123fs  | 0.00 % | 0.00 % | 0.00 %  | 0.00 %    | 0.00 %  | 0.00 %  | NA         | NA         | NA                    | NA                    | NA           | NA           | NA         | NA         | NA         | NA            |
| 38                                                            | 32456367         | c.525T>A                       | p.Cys175*   | 0.00 % | 0.00 % | 0.00 %  | 0.00 %    | 0.00 %  | 0.00 %  | 1          | Tolerated  | NA                    | NA                    | NA           | NA           | NA         | NA         | 39         | Pathogenic    |
| 39 ; 40                                                       | 32414263         | c.1288C>T                      | p.Arg430*   | 0.00 % | 0.00 % | 0.00 %  | 0.00 %    | 0.00 %  | 0.00 %  | 1          | Tolerated  | NA                    | NA                    | NA           | NA           | NA         | NA         | 40         | Pathogenic    |
| 41 ; 42 ; 43 ; 44                                             | 32413578         | c.1372C>T                      | p.Arg458*   | 0.00 % | 0.00 % | 0.00 %  | 0.00 %    | 0.00 %  | 0.00 %  | 1          | Tolerated  | NA                    | NA                    | NA           | NA           | NA         | NA         | 40         | Pathogenic    |

All cDNA and protein positions are relative to transcript NM\_024426.4

TGP AF = 1000 genomes project allele frequency

ESP AF = Exome Sequencing Project allele frequency

CG69 AF = Complete Genomics sequencing project allele frequency

NCI-60 AF = National Cancer Institute sequencing project allele frequency

GoNL AF = Genomes of the Netherlands sequencing project allele frequency

ExAC AF = Exome Aggregation Consortium allele frequency

SIFT = Functional consequence prediction tool, Damaging: [0 ≤ Score ≤ 0.05]; Tolerated [0.06 ≤ Score ≤ 1]

PolyPhen-2 = Functional consequence prediction tool, Probably Damaging: [0.909 ≤ Score ≤ 1]; Possibly Damaging: [0.447 ≤ Score ≤ 0.908]; Benign: [0 ≤ Score ≤ 0.446]

FATHMM = Functional consequence prediction tool. Damaging: [-18.09 ≤ Score < -1.5]; Tolerated: [-1.15 ≤ Score ≤ 11.00]

VEST = Functional consequence prediction tool. [0 ≤ Score ≤ 1].

CADD = Functional consequence prediction tool. Non-pathogenic: [0 ≤ Score ≤ 15]; Pathogenic: [15 < Score ≤ 99]
