# Supplementary material
Source: PubMed Central journal article supplement (PMC4422247)
Supplement: CJN.10141014_CJN10141014SupplementaryData2.pdf [file CJN.10141014_CJN10141014SupplementaryData2.pdf]

Anja Lehnhardt<sup>1</sup>, Claartje Karnatz<sup>1</sup>, Thurid Ahlenstiel-Grunow<sup>2</sup>, Kerstin Benz<sup>3</sup>, Marcus R. Benz<sup>4</sup>, Klemens Budde<sup>5</sup>, Anja K. Büscher<sup>6</sup>, Thomas Fehr<sup>7</sup>, Markus Feldkötter<sup>8</sup>, Norbert Graf<sup>9</sup>, Britta Höcker<sup>10</sup>, Therese Jungraithmayr<sup>11</sup>, Günter Klaus<sup>12</sup>, Birgit Koehler<sup>13</sup>, Martin Konrad<sup>14</sup>, Birgitta Kranz<sup>14</sup>, Carmen R. Montoya<sup>15</sup>, Dominik Müller<sup>16</sup>, Thomas J. Neuhaus<sup>17</sup>, Jun Oh<sup>1</sup>, Lars Pape<sup>2</sup>, Martin Pohl<sup>18</sup>, Brigitte Royer-Pokora<sup>19</sup>, Uwe Querfeld<sup>16</sup>, Reinhard Schneppenheim<sup>20</sup>, Hagen Staudé<sup>21</sup>, Giuseppina Sparta<sup>22</sup>, Kirsten Timmermann<sup>23</sup>, Frauke Wilkening<sup>24</sup>, Simone Wygoda<sup>25</sup>, Carsten Bergmann<sup>26,27</sup>, Markus J. Kemper<sup>1</sup>

<sup>1</sup>Pediatric Nephrology, University Medical Center Hamburg-Eppendorf, Hamburg, Germany; <sup>2</sup>Pediatric Nephrology, Hannover Medical School, Hannover, Germany; <sup>3</sup>Pediatric Nephrology, Universitätsklinikum Erlangen, Erlangen, Germany; <sup>4</sup>Pediatric Nephrology, Dr. von Haunersches Kinderspital, University Children's Hospital, Ludwig-Maximilians Universität München, Munich, Germany; <sup>5</sup>Department of Nephrology, Charité Universitätsmedizin Berlin, Berlin, Germany; <sup>6</sup>University Hospital Essen, Essen, Germany; <sup>7</sup>Division of Nephrology, University Hospital Zürich, Zurich, Switzerland; <sup>8</sup>Pediatric Nephrology, Universität zu Köln, Cologne, Germany; <sup>9</sup>Department of Pediatric Oncology and Hematology, Saarland University, Homburg, Germany. <sup>10</sup>Department of Pediatrics I, University Childrens Hospital, Heidelberg, Germany; <sup>11</sup>Pediatric Nephrology, Innsbruck Medical University, Innsbruck, Austria; <sup>12</sup>KfH Pediatric Kidney Centre, Marburg, Germany; <sup>13</sup>Pediatric Endocrinology, University Childrens Hospital, Charité, Humboldt University, Berlin Germany; <sup>14</sup>Department of General Pediatrics, University Childrens's Hospital, Münster, Germany; <sup>15</sup>Pediatric Nephrology, Klinikum München-Schwabing, Munich, Germany; <sup>16</sup>Department of Pediatric Nephrology, Charité, Berlin, Germany; <sup>17</sup>Department of Pediatrics, Kinderspital Luzern, Luzern, Switzerland; <sup>18</sup>Pediatric Nephrology, Department of Pediatrics and Adolescent Medicine, University Hospital Freiburg, Freiburg, Germany; <sup>19</sup>Institute of Human Genetics and Anthropology, Heinrich-Heine University of Düsseldorf, Düsseldorf, Germany; <sup>20</sup>Department of Pediatric Hematology and Oncology, University Medical Center Hamburg-Eppendorf, Hamburg, Germany; <sup>21</sup>Pediatric Nephrology, University of Rostock, Rostock, Germany; <sup>22</sup>Pediatric Nephrology, University Children's Hospital, Zürich, Switzerland; <sup>23</sup>Pediatric Nephrology, Olgahospital Stuttgart, Stuttgart, Germany; <sup>24</sup>Pediatric Nephrology, Helios Kliniken Schwerin, Schwerin, Germany; <sup>25</sup>Pediatric Nephrology, St. Georg Hospital, Leipzig, Germany; <sup>26</sup>Bioscientia Center for Human Genetics, Ingelheim, Germany; <sup>27</sup>Department of Nephrology&Center for Clinical Research, University Hospital Freiburg, Germany
